# Supplementary material for: Acceleration of NO2gas sensitivity in two-dimensional SnSe2by Br doping
Source: Royal Society of Chemistry journal article supplement (doi:10.1039/d2dt03784j), 2023-01-01
Supplement: d2dt03784j1.pdf [file d2dt03784j1.pdf]

**Electronic Supplementary Information (ESI) for**

**Acceleration of NO<sub>2</sub> gas sensitivity in two-dimensional SnSe<sub>2</sub> by Br doping**

Myung Sik Choi,<sup>1†</sup> Geukchan Bang,<sup>2†</sup> Jeongmin Lee,<sup>2</sup> Inseo Kim,<sup>2</sup> Joonho Bang,<sup>3</sup> Seung Yong Lee,<sup>4,5</sup> Kimoon Lee,<sup>\*2</sup> and Kyu Hyung Lee<sup>\*4</sup>

<sup>1</sup>School of Nano & Materials Science and Engineering, Kyungpook National University, Sangju 37224, Republic of Korea.

<sup>2</sup>Department of Physics, Kunsan National University, Gunsan 54150, Republic of Korea.

<sup>3</sup>School of Materials Science & Engineering, Gyeongsang National University, Jinju 52828, Republic of Korea.

<sup>4</sup>Department of Materials Science and Engineering, Yonsei University, Seoul 03722, Republic of Korea.

<sup>5</sup>KIURI Institute, Yonsei University, Seoul 03722, Republic of Korea.

<sup>†</sup>These authors contributed equally to this work.

\*e-mail : [kimoon.lee@kunsan.ac.kr](mailto:kimoon.lee@kunsan.ac.kr) and [khlee2018@yonsei.ac.kr](mailto:khlee2018@yonsei.ac.kr)

### S1. Operational stability test under a humid condition

Figure S1 shows the NO<sub>2</sub> gas sensing characteristics results for 20 ppm under a humid condition (60 RH%). The responsivity to 20 ppm NO<sub>2</sub> gas under 60 RH% is 1.0229, supporting the stability of gas sensing properties.

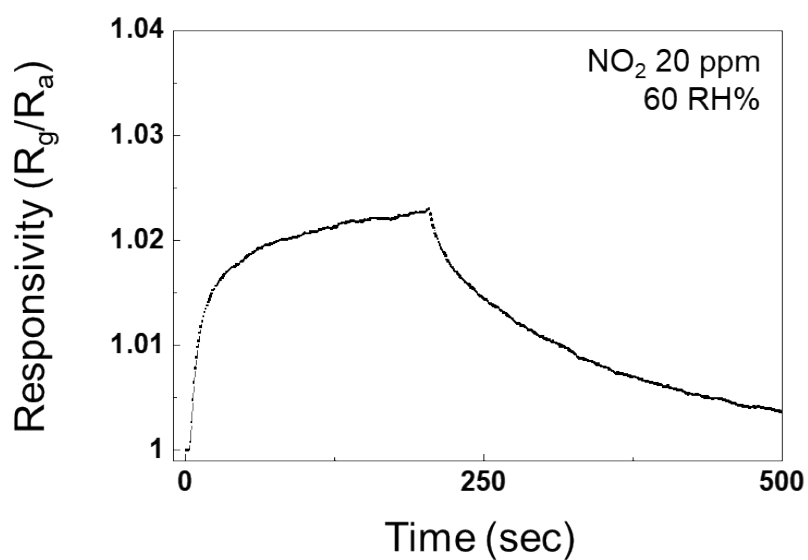

**Figure S1.** Dynamic responsivity curves of Br-doped SnSe<sub>2</sub> ( $x = 0.004$ ) at 20 ppm NO<sub>2</sub> gas under humidity condition (60 RH%)

## S2. Operational stability test under a repeated gas on and off condition

To evaluate the stability of Br-doped  $\text{SnSe}_2$  gas sensor, we performed the cyclic measurement under a repeated gas on and off condition. As shown in Figure S2, the initial resistance and its gas responsivity values are relatively well retained over five sequential cycles to 1 ppm  $\text{NO}_2$  gas at room temperature.

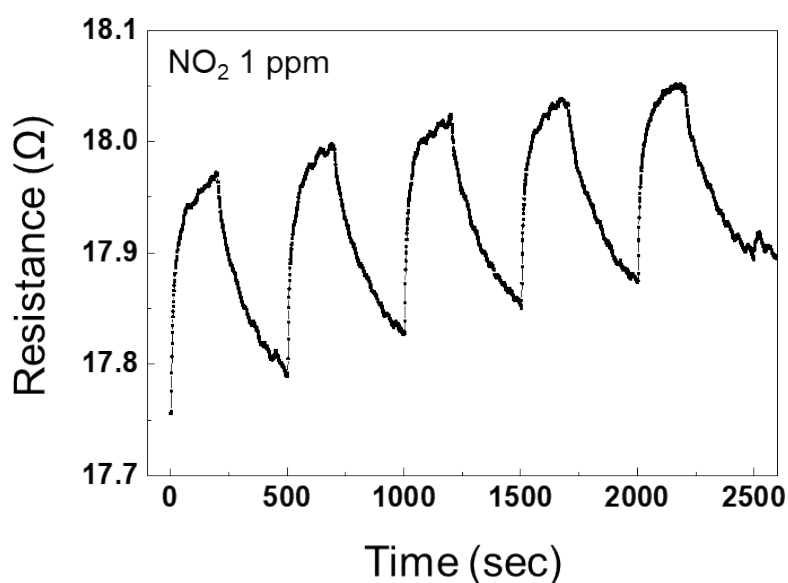

**Figure S2.** Repeatability of Br-doped  $\text{SnSe}_2$  ( $x = 0.004$ ) over five sequential cycles to 1 ppm  $\text{NO}_2$  gas at room temperature.

### S3. Gas selectivity test

We examine the selectivity of the Br-doped SnSe<sub>2</sub> gas sensor by exposing it to 20 ppm H<sub>2</sub>S gas. (Figure S3) The corresponding responsivity values is 1.0094 which is much inferior to 1.0338 with the same concentration of NO<sub>2</sub> one, strongly suggesting an excellent selectivity to NO<sub>2</sub> gas.

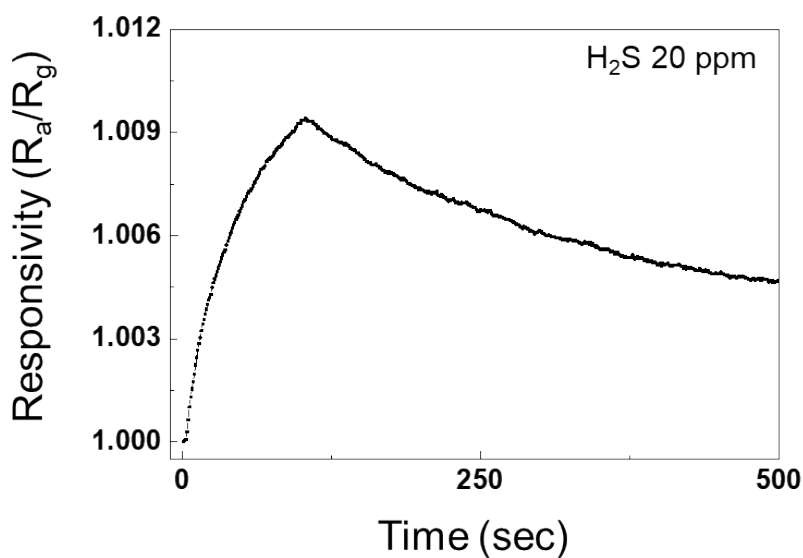

**Figure S3.** Dynamic responsivity curves of Br-doped SnSe<sub>2</sub> ( $x = 0.004$ ) gas sensor to 20 ppm H<sub>2</sub>S gas

#### S4. Comparison of gas sensing properties

**Table S1.** Comparison of NO<sub>2</sub> gas sensing properties in various 2D materials including our Br-doped SnSe<sub>2</sub>

| Material                               | NO <sub>2</sub> responsivity<br>(Concentration) | Operational<br>condition | Ref.                                                    |
|----------------------------------------|-------------------------------------------------|--------------------------|---------------------------------------------------------|
| 1L Gr                                  | 28 %<br>(10 ppm)                                | 100 – 165 °C             | <i>Small</i> , <b>10</b> , 3685 (2014)                  |
| RGO                                    | 74.3 %<br>(5 ppm)                               | RT                       | <i>J. Mater. Chem. C</i> , <b>5</b> , 6862 (2017)       |
| Gr/MoS <sub>2</sub>                    | 7 %<br>(5 ppm)                                  | 150 °C                   | <i>ACS Appl. Mater. Interf.</i> <b>7</b> , 16775 (2015) |
| N/Si co-doped<br>Gr nanosheets         | 26 %<br>(21 ppm)                                | RT                       | <i>J. Mater. Chem. A</i> , <b>1</b> , 6130 (2013)       |
| RGO/porous<br>PEDOT                    | 33 %<br>(10 ppm)                                | RT                       | <i>ACS Appl. Mater. Interf.</i> <b>6</b> , 13807 (2014) |
| Flexible Ag-<br>S-RGO                  | 45 %<br>(10 ppm)                                | RT                       | <i>ACS Appl. Mater. Interf.</i> <b>6</b> , 7426 (2014)  |
| Holey RGO<br>nanosheets                | 54 %<br>(12.5 ppm)                              | RT                       | <i>J. Mater. Chem. A</i> , <b>2</b> , 17415 (2014)      |
| Sulfonated<br>RGO                      | 58 %<br>(10 ppm)                                | RT                       | <i>Adv. Mater.</i> <b>25</b> , 766 (2013)               |
| RGO/In-SnO <sub>2</sub><br>nanohybrids | 75 %<br>(10 ppm)                                | RT                       | <i>J. Mater. Chem. A</i> , <b>1</b> , 4462 (2013)       |
| PGNS                                   | 75 %<br>(5 ppm)                                 | RT                       | <i>ACS Nano</i> , <b>12</b> , 2521 (2018)               |
| MoS <sub>2</sub> atomic<br>layer       | 15 %<br>(5 ppm)                                 | RT                       | <i>Sci. Rep.</i> <b>5</b> , 8252 (2015)                 |
| MoS <sub>2</sub> single<br>layer       | 120 %<br>(1 ppm)                                | RT                       | <i>ACS Appl. Mater. Interf.</i> <b>7</b> , 2952 (2015)  |

|                                                  |                            |           |                                                       |
|--------------------------------------------------|----------------------------|-----------|-------------------------------------------------------|
| MoS <sub>2</sub> 2 layers                        | 2.6 %<br>(1 ppm)           | RT        | <i>J. Alloys Compd.</i> <b>725</b> ,<br>253 (2017)    |
| MoS <sub>2</sub> 5 layers                        | 30 %<br>(100 ppm)          | RT        | <i>ACS Nano</i> , <b>7</b> , 4879<br>(2013)           |
| WS <sub>2</sub><br>multilayers                   | 68.4 %<br>(5 ppm)          | RT        | <i>Sens. Actuators B</i> , <b>259</b> ,<br>789 (2018) |
| SnSe <sub>2</sub><br>10 layers                   | 60 %<br>(1 ppm)            | UV light  | <i>ACS Sens.</i> <b>4</b> , 2546<br>(2019)            |
| <b>SnSe<sub>2</sub> bulky<br/>single crystal</b> | <b>3.38 %<br/>(20 ppm)</b> | <b>RT</b> | <b>Our work</b>                                       |

---
